# Supplementary material for: Switchable photon and phonon emission properties of an atomically precise Ag14core-based two-dimensional silver cluster-assembled material
Source: Royal Society of Chemistry journal article supplement (doi:10.1039/d1qm01355f), 2021-01-01
Supplement: d1qm01355f1.pdf [file d1qm01355f1.pdf]

**Supporting Information**

**Switchable photon and phonon emission properties of an atomically precise Ag<sub>14</sub> core-based two-dimensional silver cluster-assembled material**

*Anish Kumar Das,<sup>‡a</sup> Sourav Biswas,<sup>‡a</sup> Anjali Thomas,<sup>b</sup> Souradip Paul,<sup>b</sup> Akhil S. Nair,<sup>c</sup> Biswarup Pathak,<sup>c</sup> M. Suheshkumar Singh,<sup>b</sup> Sukhendu Mandal<sup>a\*</sup>*

<sup>a</sup> *School of Chemistry, Indian Institute of Science Education and Research Thiruvananthapuram, Kerala 69551, India. E-mail: sukhendu@iisertvm.ac.in*

<sup>b</sup> *Biomedical Instrumentation and Imaging Laboratory, School of Physics, Indian Institute of Science Education and Research Thiruvananthapuram, Kerala 69551, India.*

<sup>c</sup> *Department of Chemistry, Indian Institute of Technology, Indore, Madhya Pradesh 453552, India.*

<sup>‡</sup> These authors contributed equally to this work.

## Table of contents

| Name     | Description                                                                                         | Page No. |
|----------|-----------------------------------------------------------------------------------------------------|----------|
|          | Experimental section                                                                                | S4-S6    |
| Table S1 | Crystal data and structure refinement parameters                                                    | S7-S8    |
| Table S2 | Bond distances of <b>crystal 1</b>                                                                  | S9       |
| Fig. S1  | Synthetic route of Ag <sub>14</sub> CAMs and optimization table of the synthesis                    | S10      |
| Fig. S2  | Simulated and experimental PXRD patterns of <b>crystal 1</b> and <b>crystal 1a</b>                  | S11      |
| Fig. S3  | Asymmetric unit of <b>crystal 1</b>                                                                 | S12      |
| Fig. S4  | Schematic formation of the core geometry                                                            | S13      |
| Fig. S5  | Arrangement of $\mu_4$ and $\mu_3$ S with the Ag <sub>14</sub> core                                 | S14      |
| Fig. S6  | Deconvolution of XPS data of <b>crystal 1</b>                                                       | S15      |
| Fig. S7  | <sup>1</sup> H NMR in CDCl <sub>3</sub> of <b>crystal 1</b> and precursors                          | S16      |
| Fig. S8  | <sup>19</sup> F NMR in CDCl <sub>3</sub> of <b>crystal 1</b> and precursors                         | S17      |
| Fig. S9  | Solid-state UV-vis spectra of <b>crystal 1</b>                                                      | S18      |
| Fig. S10 | Solid-state UV-vis spectra and PXRD of <b>crystal 1</b> after 3 months of synthesis                 | S19      |
| Fig. S11 | UV-vis absorbance of <b>crystal 1</b> and the precursors in E/A medium                              | S20      |
| Fig. S12 | Theoretically simulated absorbance spectra of both compounds                                        | S21      |
| Fig. S13 | Molecular Orbitals involved in optical transitions of <b>crystal 1</b> in E/A                       | S22      |
| Fig. S14 | PL excitation and emission of <b>crystal 1</b> in (a) E/A and (b) E/C medium                        | S23      |
| Fig. S15 | PL of <b>crystal 1</b> dissolving in different solvents and dissolving in different ratios of E/A/C | S24      |
| Fig. S16 | Molecular Orbitals involved in optical transitions of <b>crystal 1</b> in E/C                       | S25      |
| Fig. S17 | TCSPC trajectories of <b>crystal 1</b>                                                              | S26      |
| Fig. S18 | Relative stability of Ag <sub>14</sub> crystals obtained from DFT calculations.                     | S27      |
| Fig. S19 | Dihedral angle between linker and core in Ag <sub>14</sub> crystals                                 | S28      |
| Fig. S20 | Inter-cluster C-H...F interaction of Ag <sub>14</sub> crystals                                      | S29      |
| Fig. S21 | Deconvolution of XPS data of <b>crystal 1a</b>                                                      | S30      |
| Fig. S22 | FT-IR spectra of both compounds                                                                     | S31      |
| Fig. S23 | TGA of both compounds                                                                               | S32      |
| Fig. S24 | Solid-state UV-vis spectra of <b>crystal 1a</b>                                                     | S33      |
| Fig. S25 | Solid-state PL of both compounds                                                                    | S34      |
| Fig. S26 | Schematic representation of interchanging behavior of <b>crystal 1</b> and <b>crystal 1a</b>        | S35      |

|          |                                                                                              |     |
|----------|----------------------------------------------------------------------------------------------|-----|
| Fig. S27 | Dynamics of <b>crystal 1</b> in E/C towards the highest PL intensity                         | S36 |
| Fig. S28 | Dynamics of <b>crystal 1a</b> in E/A towards the lowest PL intensity                         | S37 |
| Fig. S29 | FT-IR spectra of <b>crystal 1</b> and <b>crystal 1a</b> in their respective solvent mixtures | S38 |
| Fig. S30 | PA signal strength of both solutions of <b>crystal 1</b> at a different wavelength           | S39 |
| Fig. S31 | PA signal strength of the solvents for control                                               | S40 |
| Fig. S32 | Schematic representation of pre-illumination PA signal detection technique                   | S41 |
|          | References                                                                                   | S42 |

## Experimental Section

### Materials

All chemicals were purchased commercially and used without prior purification. Silver nitrate ( $\text{AgNO}_3$ ), tert butylthiol ( $\text{HS}^t\text{Bu}$ ), silver trifluoroacetate ( $\text{CF}_3\text{COOAg}$ ), phenyl phosphonic acid, and 4,4'-azopyridine were procured from Sigma-Aldrich. HPLC grade solvents- methanol, ethanol, acetonitrile, chloroform, and triethylamine ( $\text{Et}_3\text{N}$ ) were purchased from Spectrochem. Milli-Q water was used in all experiments. All glassware was thoroughly cleaned with aqua regia ( $\text{HCl}:\text{HNO}_3=3:1$ , v:v), rinsed with copious pure water.

### Synthesis of two-dimensional $\text{Ag}_{14}$ cluster-assembled material

**Crystal 1** was synthesized by a facile one-pot synthetic approach. 0.1 mmol of  $\text{AgS}^t\text{Bu}$  and 0.1 mmol of  $\text{CF}_3\text{COOAg}$  were sequentially added into the 6 ml of a solvent mixture of E/A (1:1) and stirred up to form a colorless clear solution. Subsequently, 0.13 mmol of phenyl phosphonic acid and 0.13 mmol of 4,4'-azopyridine were sequentially added into both solution mixtures and kept stirring for another 15 min at room temperature. A yellowish-brown precipitate was formed and that was separated by centrifugation. Then the final clear solution was kept at room temperature in a dark environment for 3 days and crystals were obtained by slow evaporation of the solvent (Yield: 58 % on the basis of Ag). The precursor,  $\text{AgS}^t\text{Bu}$  complex was synthesized by treating the equivalent amount of  $\text{AgNO}_3$  and  $\text{HS}^t\text{Bu}$  with  $\text{Et}_3\text{N}$ , as reported in the literature.<sup>1</sup> The use of multi-dentate phenyl phosphonic acid is crucial here because of its H-bond donating ability, and we observed that without adding it, we can't get the desired product.

In the case of the E/C mixture, we just replaced the solvent medium in this protocol to synthesize **crystal 1a**. After adding  $\text{AgS}^t\text{Bu}$  and  $\text{CF}_3\text{COOAg}$  in that solution mixture it turns greenish-yellow colored clear solution instead of this all other observations are the same as the E/A mixture (Yield: 51 % on the basis of Ag).

### X-ray Crystallography

The single-crystal X-ray diffraction data for cluster-assembled material was collected on the Bruker Axs Kappa Apex II SC-XRD diffractometer with CCD detector using monochromated  $\text{MoK}_\alpha$  radiation ( $\lambda=0.71073 \text{ \AA}$ ). The crystal structure was solved by SHELXT 201449 and refined by the full-matrix least-squares method using SHELXL 201850 present in the program

suite WinGX (version 2014.1).<sup>2-4</sup> All non-hydrogen atoms were refined anisotropically and hydrogen atoms were (positioned geometrically) refined isotropically using an olex2.<sup>5</sup>

## Computational Details

DFT calculations were done using Gaussian 09 D.01 program.<sup>6</sup> B3LYP functional with Pople's 6-31G\* basis set was used for non-metal elements and LANL2DZ-ECP (effective core potential) was employed for silver atoms, respectively.<sup>7</sup> Conductor-like polarizable continuum model (CPCM) with acetonitrile and chloroform were employed for solvent calculations.<sup>8</sup> The TD-DFT calculations considered 300 singlet-to-singlet excitation energies. The calculations were carried out for the molecular unit of the silver cluster-assembled material (CAM).

The stability calculations of bulk Ag CAM with periodic boundary conditions were carried out using Vienna Ab-Initio Simulation Package (VASP) employing optPBE van der Waals functional.<sup>9</sup> A similar calculation without van der Waals consideration was also carried out using Generalized gradient approximation of Perdew–Burke–Ernzerhof (PBE) functional for identifying the role of non-covalent interactions in determining the relative stability of the two crystal structures.<sup>10, 11</sup> Projector augmented wave (PAW) method was used for treating ion-electron interactions.<sup>12, 13</sup> The ionic relaxations have been carried out using a conjugate gradient algorithm with convergence criteria of  $10^{-4}$  eV for minimum energy and  $0.05 \text{ eV } \text{\AA}^{-1}$  for Hellmann-Feynman forces on atoms. Due to the large size of the unit cells of the compounds, the Brillouin zone was sampled at the Gamma point ( $1 \times 1 \times 1$ ).

## Instrumentation

UV-vis spectroscopy was carried out on a UV-3800 SHIMADZU UV-vis/NIR spectrometer using a 3.5 ml cuvette. Emission measurements were performed using a Fluorolog-3 spectrofluorimeter from Horiba Jobin Yvon. The relative quantum yields were determined by the best match of the excitation wavelength of a well-known chromophore such as Perylene with the crystals and the excitation was fixed at 410 nm. The concentration of the solutions was fixed by adjusting the absorption 0.05 OD and measured the quantum yield at room temperature. XPS measurements have been done using the Omicron Nanotech instrument ( $\text{MgK}\alpha$  radiation at 1253.6 eV). All binding energies were referenced to the neutral C 1s peak at 284.8 eV. IR spectra (with the spectral resolution of  $4 \text{ cm}^{-1}$ ) were collected on a Shimadzu IRPrestige-21 FTIR spectrometer by using the KBr pellet method. Solution-state FT-IR spectra were recorded by a Bruker-Alpha (ATR-ZnSe) instrument. Bruker Avance III, 500 MHz, NMR

was used for the  $^1\text{H}$  and  $^{19}\text{F}$  NMR studies. PXRD data were collected employing an X'pert PRO (PANalytics) powder diffractometer equipped with a Cu K $\alpha$  ( $\lambda = 1.5405 \text{ \AA}$ ) radiation source. The TGA was performed on SDT Q600 (Shimadzu) analyzer from room temperature to  $600 \text{ }^\circ\text{C}$  at a heating rate of  $10 \text{ }^\circ\text{C min}^{-1}$  under  $\text{N}_2$  atmosphere. Emission lifetimes were measured using a picosecond time-correlated single-photon counting system (model Horiba Jobin Yvon-IBH). Solutions were excited at  $475 \text{ nm}$  using a pulsed diode laser. The fluorescent decay curve was fitted with a monoexponential decay fit.

PA-images were recorded for **crystal 1** and **1a** in E/A and E/C solvent mixture and the solutions were taken inside two different transparent tubes with inner diameter  $0.28 \text{ mm}$  and kept in the sample holder of the transmission confocal home-built acoustic resolution photoacoustic microscopy (AR-PAM) imaging system.<sup>14</sup> Each sample was illuminated with an optical beam of  $2.3 \text{ mm}$  diameter, and a tuneable  $100 \text{ Hz}$  pulse repetition frequency of a  $6 \text{ nsec}$  pulse width (SpitLight OPO Evo 150–532, Innolas Lasers, Krailling, Germany), coupled by an optical fibre. The energy and wavelength of the laser were set as  $10 \text{ mJ}$  and  $450 \text{ nm}$ , respectively. The induced PA signal was collected by a tightly focusing  $30 \text{ MHz}$  (focal spot size  $154 \text{ }\mu\text{m}$  and focal length  $19.10 \text{ mm}$ ) ultrasound transducer (V375-SU, Olympus, Shinjuku City, Tokyo, Japan). The detected signal was then amplified using an amplifier (Part No.: VCA2615EVM, Texas Instruments, Dallas, Texas, USA), sampled using a data acquisition card (Part No.: 779745-02, NI PCI-5114,  $250 \text{ MS/s}$ , National Instruments, Austin, Texas, USA) and saved to the system for further processing. To produce the 3D data, raster scanning of the transducer with step-size  $100 \text{ }\mu\text{m}$  was utilized with a high precession translation stage (Newmark NSC-G series, Newmark Systems Inc., Rancho Santa Margarita, CA, USA). From these data MAP (Maximum Amplitude Projection) images along depth were produced with MATLAB for comparison and analysis.

To enhance PA signal strength, we adopted our reported optical pre-illumination technique in which CW-optical beam from a laser source (NPL52B, Thorlabs, Newton, New Jersey, USA; wavelength,  $520 \text{ nm}$ , power,  $40 \text{ mW}$ ) – in addition to pulse-laser beam adopted for generating of PA waves – was employed to illuminate the samples by intersecting the pulse-laser beam and CW-beam at a pre-specified section.<sup>14</sup> Continuously switched on CW-laser retain the temperature throughout the experiment and we call this process pre-illumination. Here we have used a pulsed laser at  $650 \text{ nm}$  for imaging so that the change in PA signal with temperature will be much more visible.

**Table S1a.** Crystal data and structure refinement parameters for **Crystal 1**

|                                   |                                                                                                                             |
|-----------------------------------|-----------------------------------------------------------------------------------------------------------------------------|
| Identification code               | <b>Crystal 1</b>                                                                                                            |
| CCDC number                       | 2093651                                                                                                                     |
| Empirical formula                 | C <sub>34</sub> H <sub>53</sub> Ag <sub>7</sub> F <sub>6</sub> N <sub>4</sub> O <sub>4</sub> S <sub>5</sub>                 |
| Formula weight                    | 1611.19                                                                                                                     |
| Temperature                       | 150 (2) K                                                                                                                   |
| Wavelength                        | 0.71073 Å                                                                                                                   |
| Crystal system                    | Monoclinic                                                                                                                  |
| Space group                       | C2/c                                                                                                                        |
| Unit cell dimensions              | a = 23.087(3) Å; b = 14.5454(17) Å, c = 30.330(4) Å; $\alpha = 90^\circ$ ; $\beta = 102.868(5)^\circ$ ; $\gamma = 90^\circ$ |
| Volume                            | 9929(2) Å <sup>3</sup>                                                                                                      |
| Z                                 | 8                                                                                                                           |
| Density (calculated)              | 2.156 mg/m <sup>3</sup>                                                                                                     |
| Absorption coefficient            | 2.975 mm <sup>-1</sup>                                                                                                      |
| F(000)                            | 6240                                                                                                                        |
| Crystal size                      | 0.075 x 0.035 x 0.025 mm <sup>3</sup>                                                                                       |
| Theta range for data collection   | 1.377 to 28.374 °.                                                                                                          |
| Limiting indices                  | -30<= <i>h</i> <=30, -19<= <i>k</i> <=19, -40<= <i>l</i> <=40                                                               |
| Reflections collected             | 69651                                                                                                                       |
| Independent reflections           | 12386 [R(int) = 0.2494]                                                                                                     |
| Completeness to theta = 25.242 °  | 99.9 %                                                                                                                      |
| Refinement method                 | Full-matrix-block least-squares on F <sup>2</sup>                                                                           |
| Data / restraints / parameters    | 12386 / 0 / 551                                                                                                             |
| Goodness-of-fit on F <sup>2</sup> | 0.930                                                                                                                       |
| Final R indices [I > 2sigma(I)]   | R <sub>1</sub> = 0.0713, wR <sub>2</sub> = 0.1494                                                                           |
| R indices (all data)              | R <sub>1</sub> = 0.1930, wR <sub>2</sub> = 0.2154                                                                           |
| Largest diff. peak and hole       | 1.630 and -1.930 e. Å <sup>-3</sup>                                                                                         |

**Table S1b.** Crystal data and structure refinement parameters for **Crystal 1a**

|                                   |                                                                                                                               |
|-----------------------------------|-------------------------------------------------------------------------------------------------------------------------------|
| Identification code               | <b>Crystal 1a</b>                                                                                                             |
| CCDC number                       | 2093652                                                                                                                       |
| Empirical formula                 | C <sub>34</sub> H <sub>53</sub> Ag <sub>7</sub> F <sub>6</sub> N <sub>4</sub> O <sub>4</sub> S <sub>5</sub>                   |
| Formula weight                    | 1611.19                                                                                                                       |
| Temperature                       | 150 (2) K                                                                                                                     |
| Wavelength                        | 0.71073 Å                                                                                                                     |
| Crystal system                    | Monoclinic                                                                                                                    |
| Space group                       | C2/c                                                                                                                          |
| Unit cell dimensions              | a = 23.0645(19) Å; b = 14.5322(12) Å, c = 30.379(3) Å; $\alpha = 90^\circ$ ; $\beta = 102.842(3)^\circ$ ; $\gamma = 90^\circ$ |
| Volume                            | 9927.6(14) Å <sup>3</sup>                                                                                                     |
| Z                                 | 8                                                                                                                             |
| Density (calculated)              | 2.156 mg/m <sup>3</sup>                                                                                                       |
| Absorption coefficient            | 2.975 mm <sup>-1</sup>                                                                                                        |
| F(000)                            | 6240                                                                                                                          |
| Crystal size                      | 0.085 x 0.057 x 0.035 mm <sup>3</sup>                                                                                         |
| Theta range for data collection   | 1.375 to 28.417 °.                                                                                                            |
| Limiting indices                  | -30<=h<=30, -19<=k<=19, -40<=l<=40                                                                                            |
| Reflections collected             | 87500                                                                                                                         |
| Independent reflections           | 12396 [R(int) = 0.1488]                                                                                                       |
| Completeness to theta = 25.242 °  | 99.9 %                                                                                                                        |
| Refinement method                 | Full-matrix-block least-squares on F <sup>2</sup>                                                                             |
| Data / restraints / parameters    | 12396 / 0 / 556                                                                                                               |
| Goodness-of-fit on F <sup>2</sup> | 1.005                                                                                                                         |
| Final R indices [I > 2sigma(I)]   | R <sub>1</sub> = 0.0544, wR <sub>2</sub> = 0.1139                                                                             |
| R indices (all data)              | R <sub>1</sub> = 0.1196, wR <sub>2</sub> = 0.1437                                                                             |
| Largest diff. peak and hole       | 1.269 and -1.588 e. Å <sup>-3</sup>                                                                                           |



**Table S2.** Bond distances of **crystal 1**.

| <b>Ag<sub>14</sub> CAM</b> | <b>Bond distances (Å)</b> |
|----------------------------|---------------------------|
| Ag1-Ag2                    | 2.948                     |
| Ag1-Ag3                    | 3.016                     |
| Ag1-Ag6                    | 3.189                     |
| Ag2-Ag4                    | 2.948                     |
| Ag4-Ag5                    | 2.934                     |
| Ag5-Ag1                    | 3.036                     |
| Ag5-Ag7                    | 3.098                     |
| Ag1-S1 ( $\mu_4$ )         | 2.405                     |
| Ag2-S1 ( $\mu_4$ )         | 2.444                     |
| Ag3-S1 ( $\mu_4$ )         | 2.695                     |
| Ag4-S1 ( $\mu_4$ )         | 2.962                     |
| Ag3-S2 ( $\mu_3$ )         | 2.458                     |
| Ag6-S2 ( $\mu_3$ )         | 2.486                     |
| Ag7-S2 ( $\mu_3$ )         | 2.413                     |
| Ag2-S3 ( $\mu_3$ )         | 2.379                     |
| Ag4-S3 ( $\mu_3$ )         | 2.491                     |
| Ag7-S3 ( $\mu_3$ )         | 2.655                     |
| Ag1-S4 ( $\mu_3$ )         | 2.398                     |
| Ag5-S4 ( $\mu_3$ )         | 2.445                     |
| Ag6-S4 ( $\mu_3$ )         | 2.554                     |
| Ag4-S5 ( $\mu_3$ )         | 2.551                     |
| Ag5-S5 ( $\mu_3$ )         | 2.503                     |
| Ag7-S5 ( $\mu_3$ )         | 2.484                     |
| Ag5-O1                     | 2.423                     |
| Ag4-O2                     | 2.302                     |
| Ag6-O3                     | 2.433                     |
| Ag3-O4                     | 2.450                     |

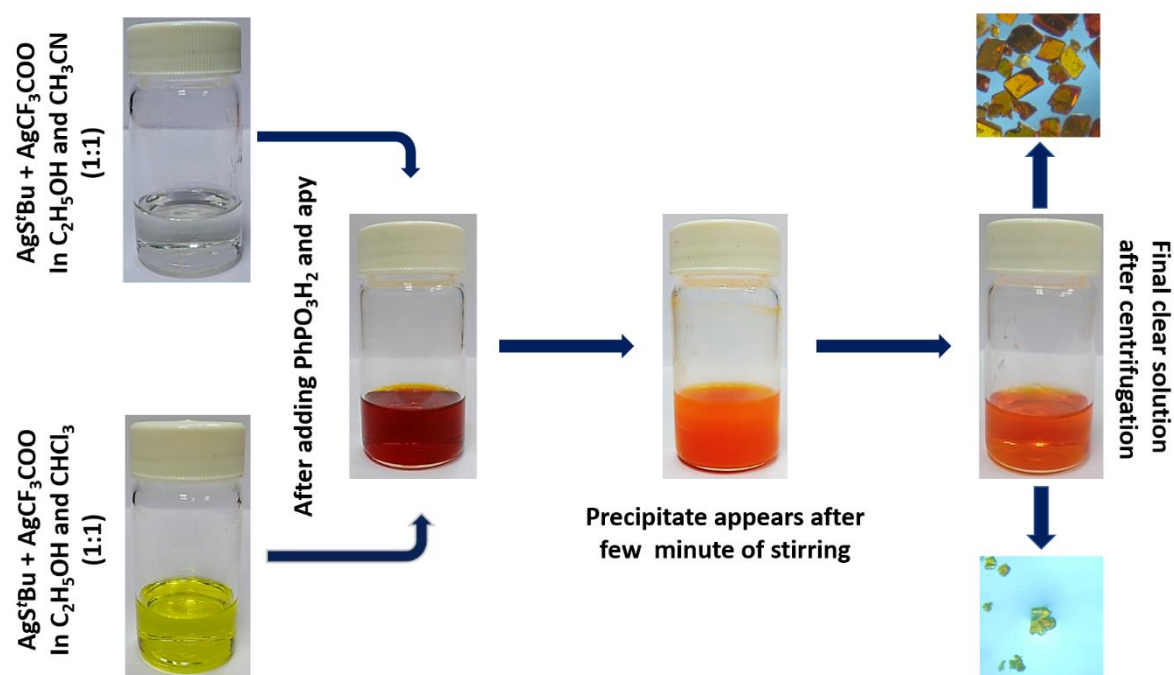

| AgS'Bu    | AgCF <sub>3</sub> COO | 4,4'-azopyridine | Results                |
|-----------|-----------------------|------------------|------------------------|
| 0.1 mmol  | 0.1 mmol              | 0.065 mmol       | Crystals with impurity |
| 0.05 mmol | 0.05 mmol             | 0.13 mmol        | No crystals            |
| 0.05 mmol | 0.1 mmol              | 0.13 mmol        | Powder                 |
| 0.1 mmol  | 0.05 mmol             | 0.13 mmol        | Crystals with impurity |
| 0.1 mmol  | 0.1 mmol              | 0.13             | Pure crystals          |

**Fig. S1** Synthetic route of Ag<sub>14</sub>(S'Bu)<sub>10</sub>(CF<sub>3</sub>COO)<sub>4</sub>(apy)<sub>2</sub> in ethanol/acetonitrile (**crystal 1**) and ethanol/chloroform mixture (**crystal 1a**), below optimization table of the reagents. This optimization table we have followed in E/A (3 ml/3 ml) and in E/C (3 ml/3 ml) solvent mixture separately keeping fixed the amount of the phenyl phosphonic acid as it is not bonded with the crystals.

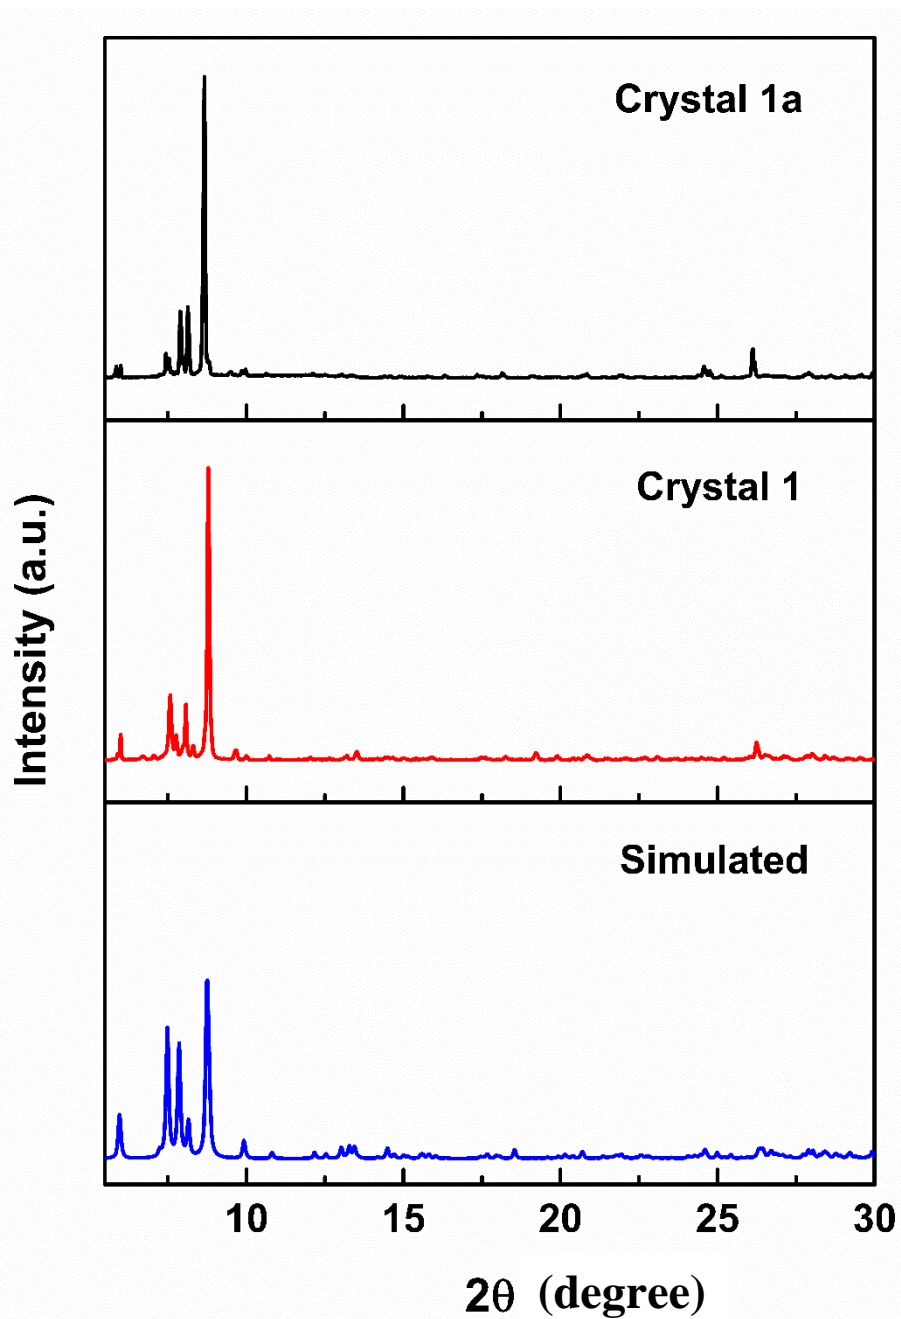

**Fig. S2** Simulated and experimental PXRD patterns of **crystal 1** and **crystal 1a**.

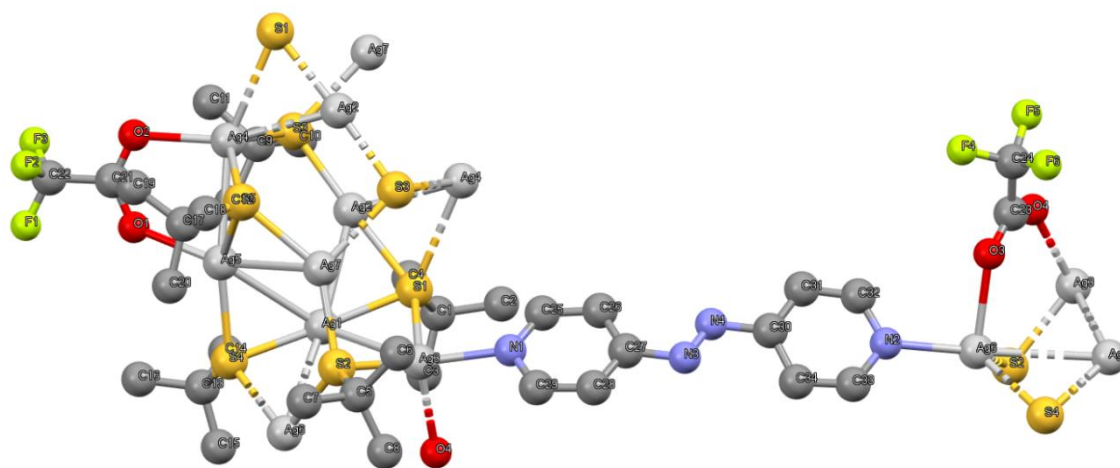

**Fig. S3** Asymmetric unit of **crystal 1**.

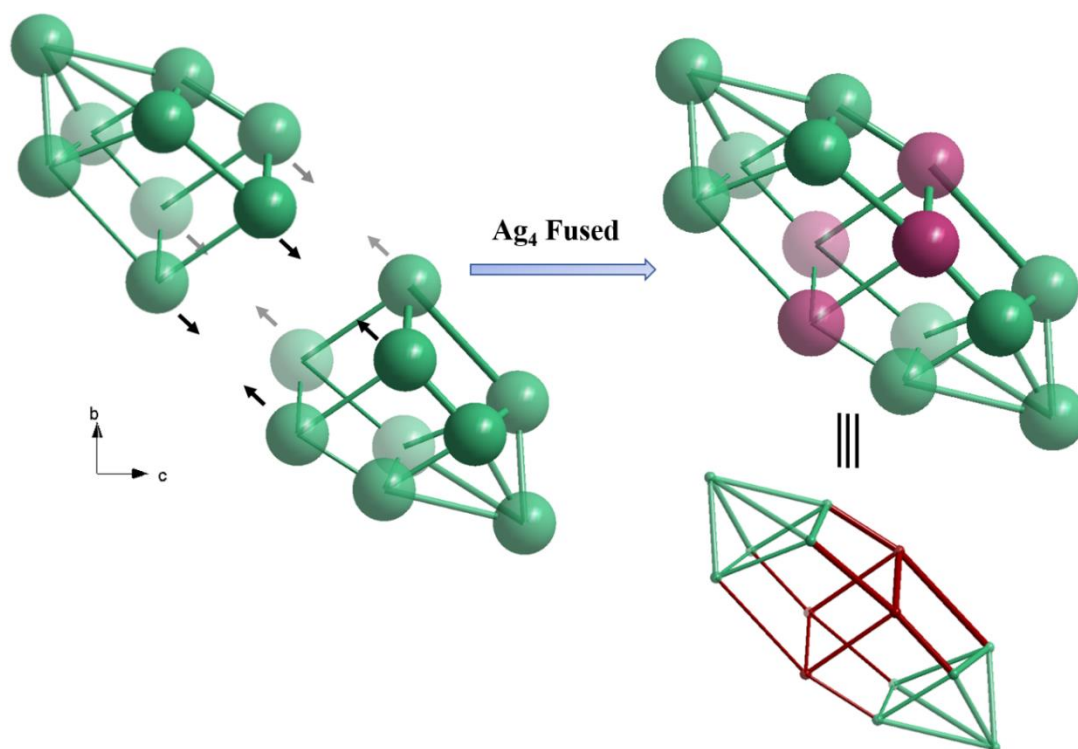

**Fig. S4** Schematic formation of ortho-bielongated square pyramid core geometry by face fusion of two distorted elongated square pyramid.

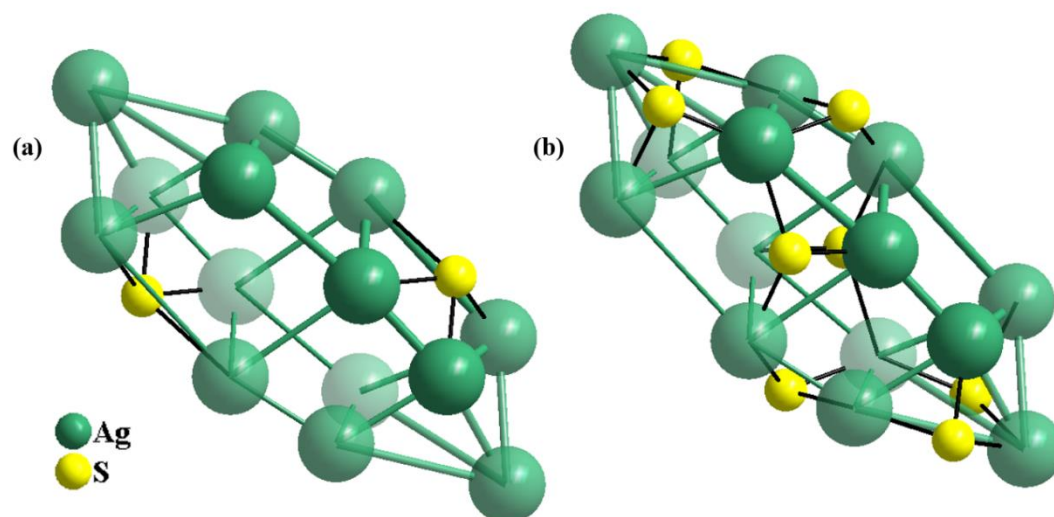

**Fig. S5** Arrangement of  $\mu_4$  and  $\mu_3$  S with the  $\text{Ag}_{14}$  core.

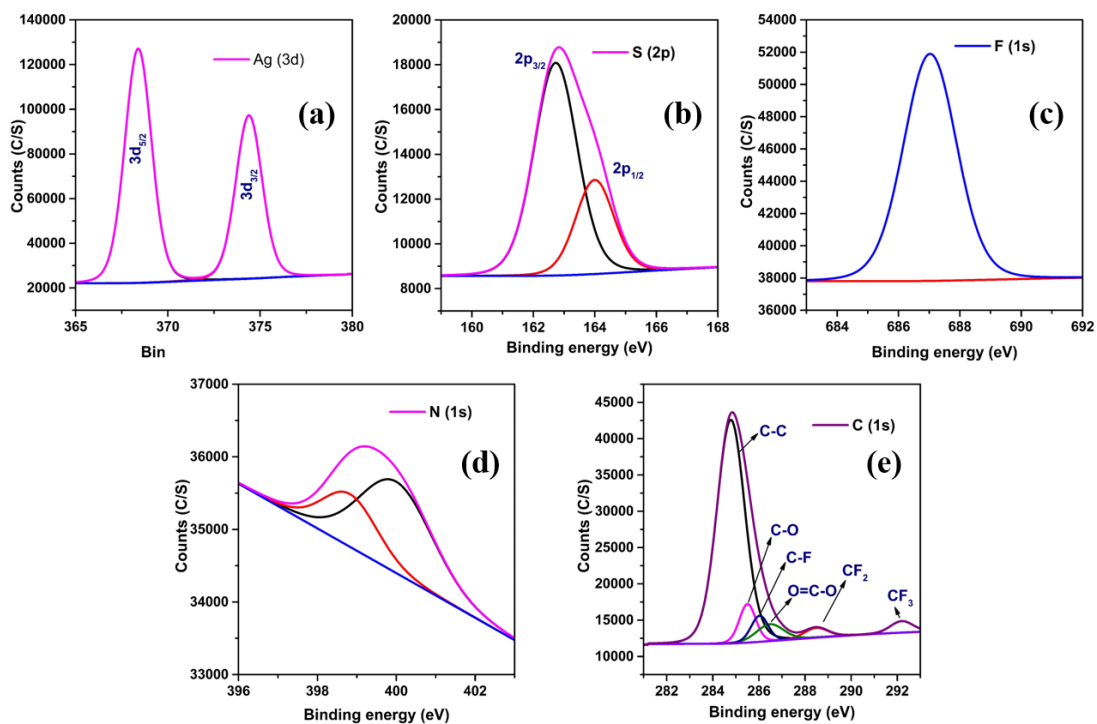

**Fig. S6** The deconvolution of XPS data of (a)  $3d_{5/2}$  and  $3d_{3/2}$  for Ag ; (b)  $2p_{3/2}$  and  $2p_{1/2}$  for S atom, (c) 1s for F atom, (d) 1s for N atom and (e) 1s for C atom of **crystal 1**.

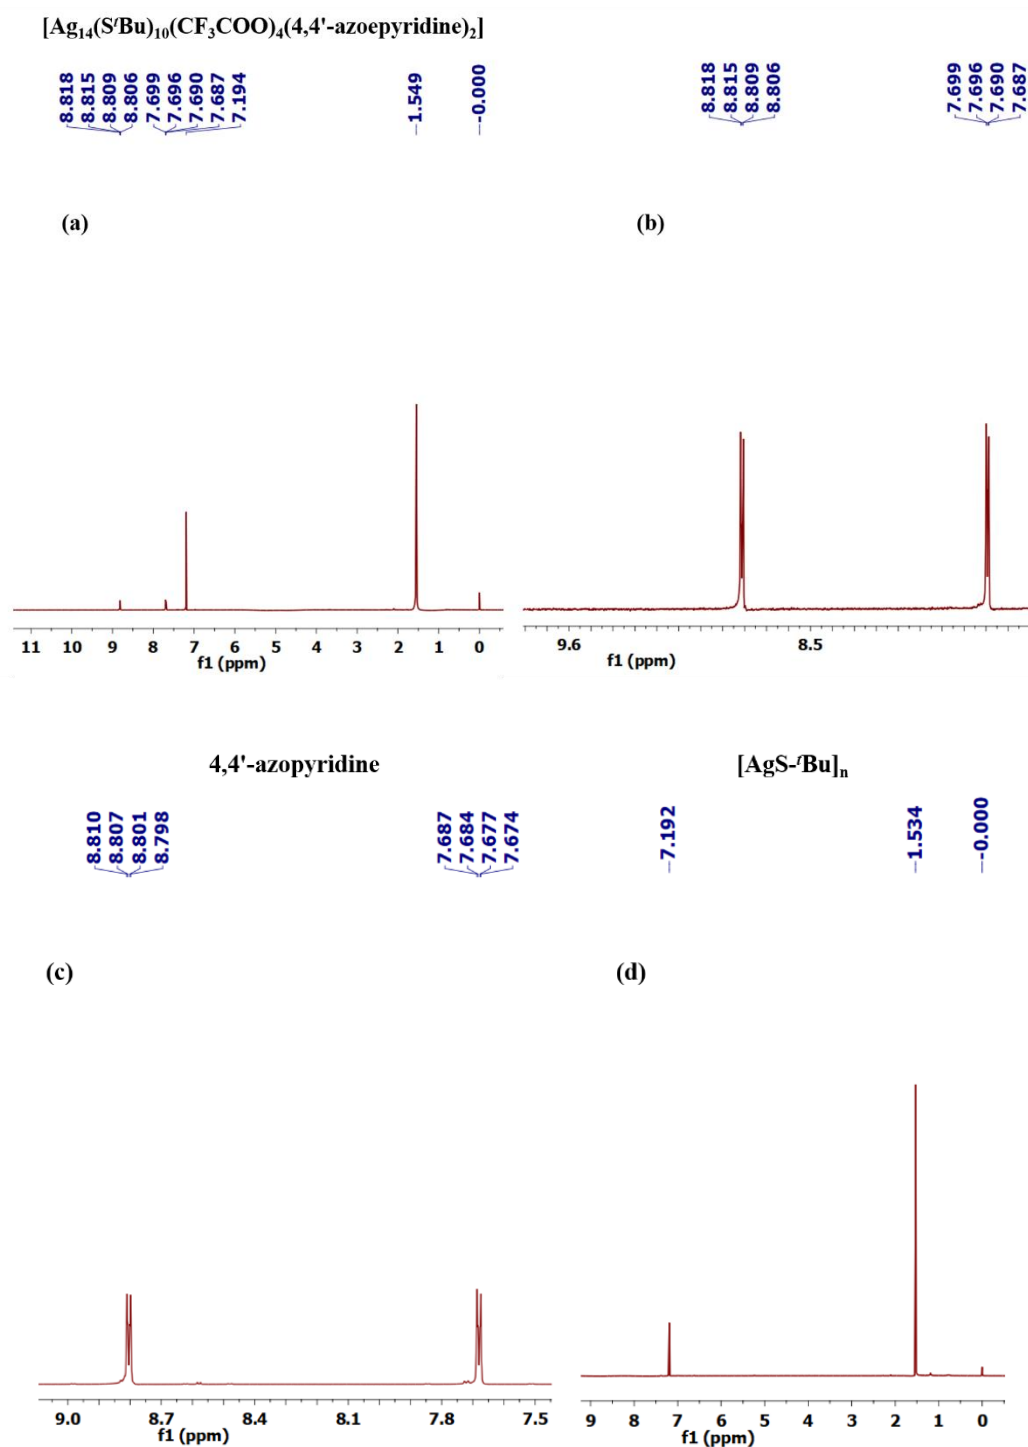

**Fig. S7**  $^1\text{H}$  NMR in  $\text{CDCl}_3$  of (a) **crystal 1**, (b) aromatic region of **crystal 1**, (c) 4,4'-azopyridine, and (d)  $[\text{AgS}^t\text{Bu}]_n$ .



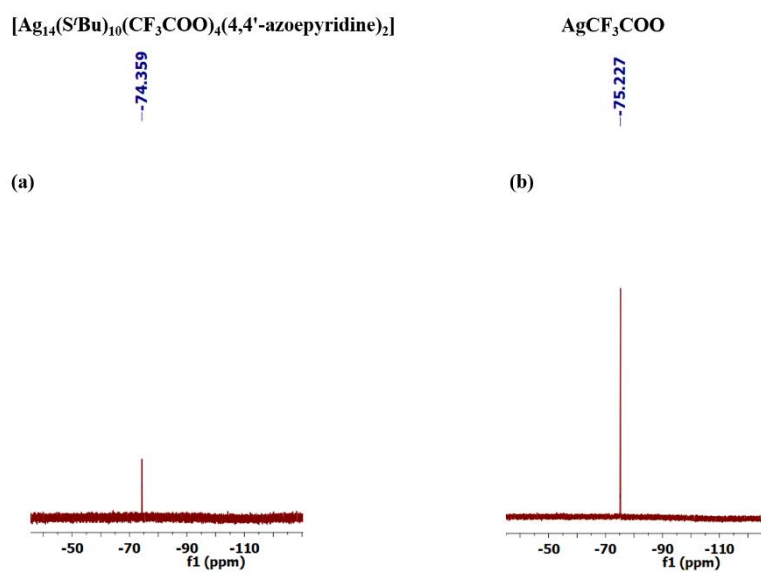

**Fig. S8**  $^{19}\text{F}$  NMR in  $\text{CDCl}_3$  of (a) **crystal 1** and (b)  $\text{AgCF}_3\text{COO}$ .

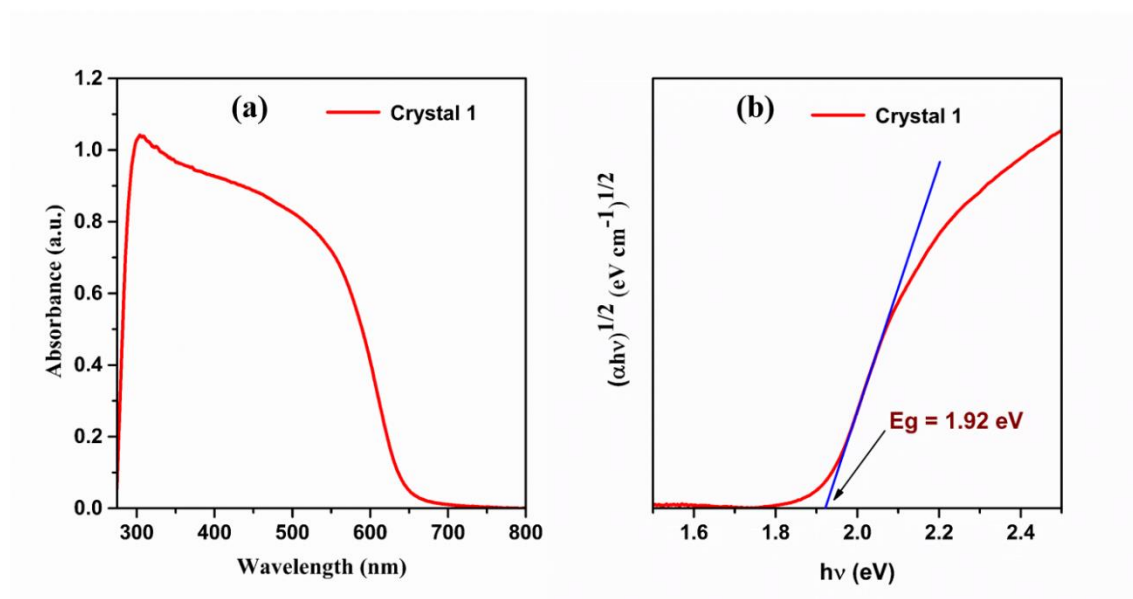

**Fig. S9** (a) Solid-state UV-vis absorbance of **crystal 1** and (b) its characteristic band gap energy.

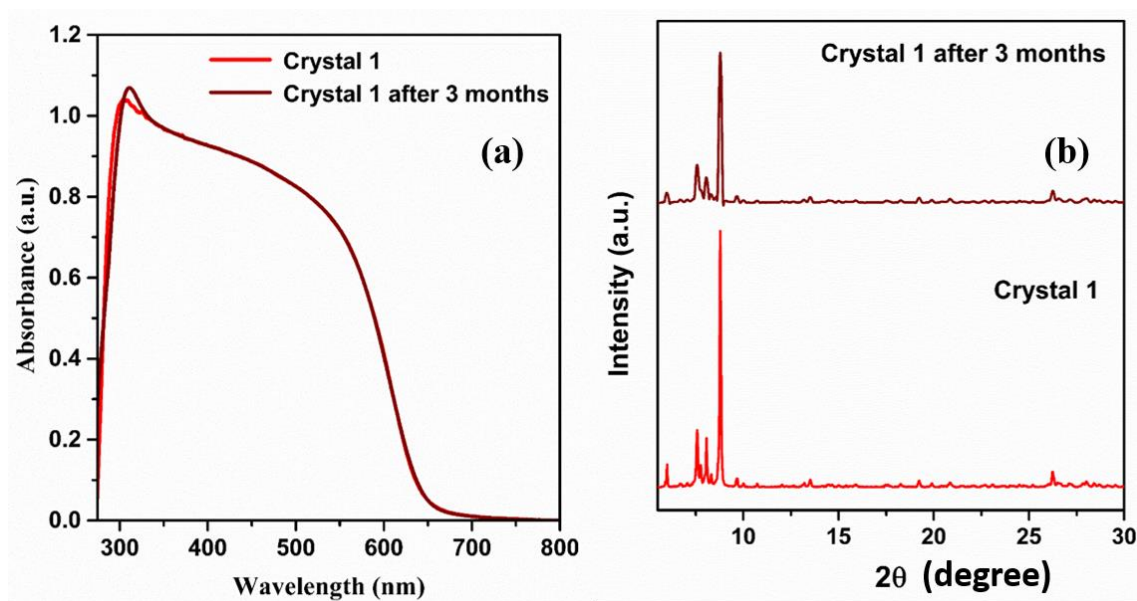

**Fig. S10** (a) Solid-state UV-vis absorbance and (b) PXRD of **crystal 1** in day one of synthesis and after 90 days of synthesis.

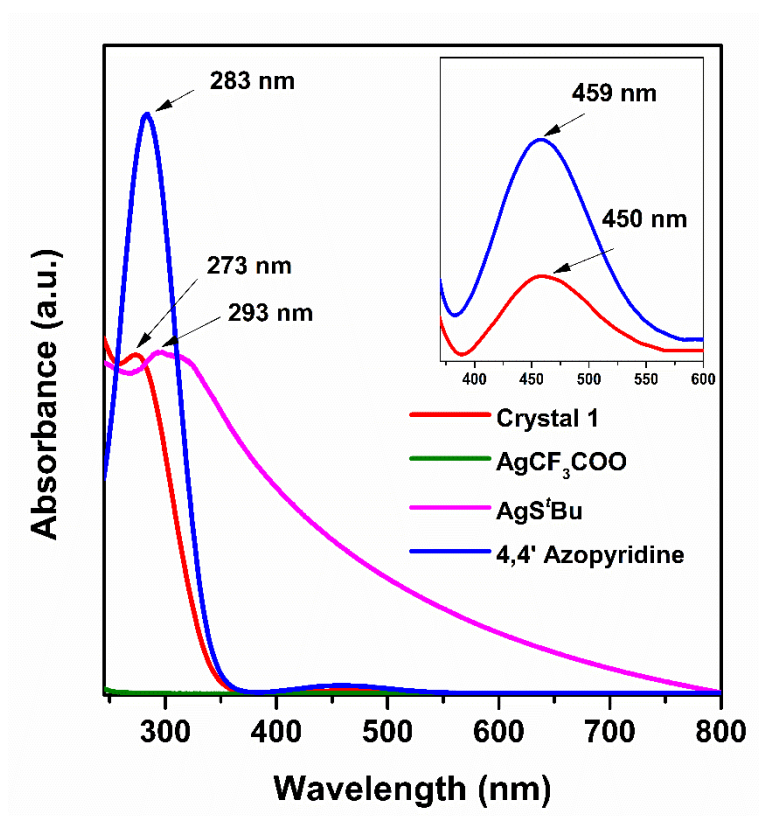

**Fig. S11** UV-vis absorbance of **crystal 1** and the precursors in E/A medium.

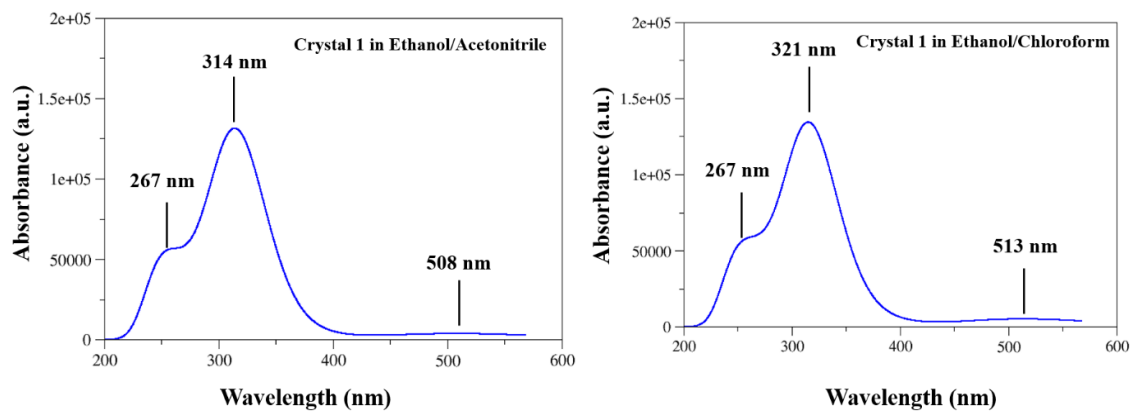

**Fig. S12** Theoretically simulated absorbance spectra for the molecular unit of the crystals using time-dependent density functional theory (TDDFT) calculations by the Gaussian 09 program.

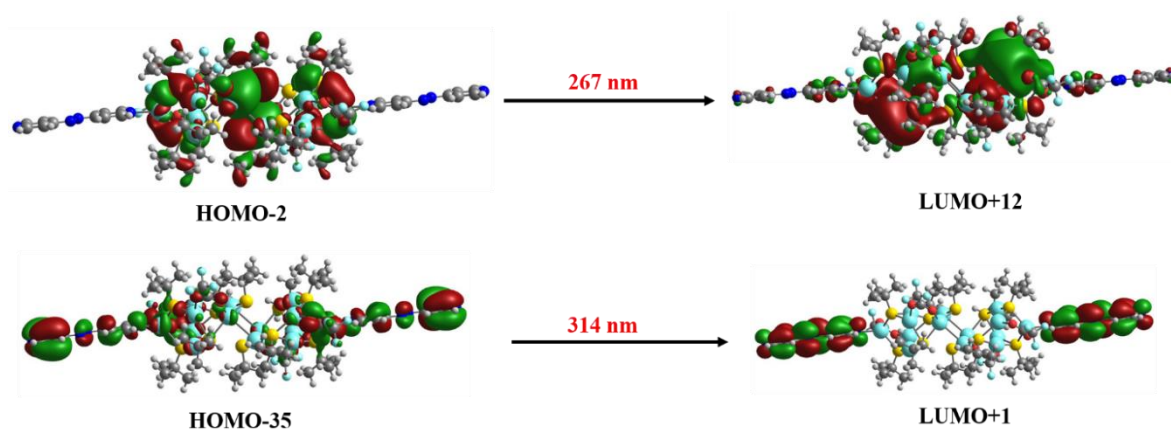

**Fig. S13** Molecular Orbitals involved in optical transitions of **crystal 1** in ethanol/acetonitrile solvent mixture. Colour code: Ag (large Cyan), S (yellow), O (red), N (blue), F (small Cyan), C (gray), H (white).

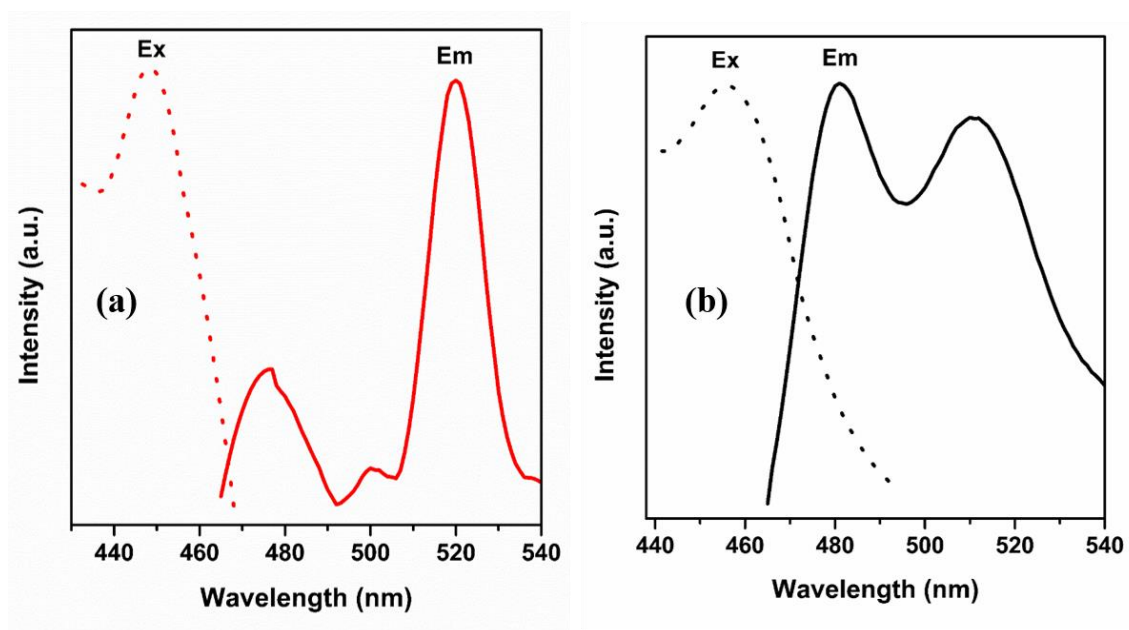

**Fig. S14** PL excitation and emission of **crystal 1** in (a) E/A and (b) E/C medium.

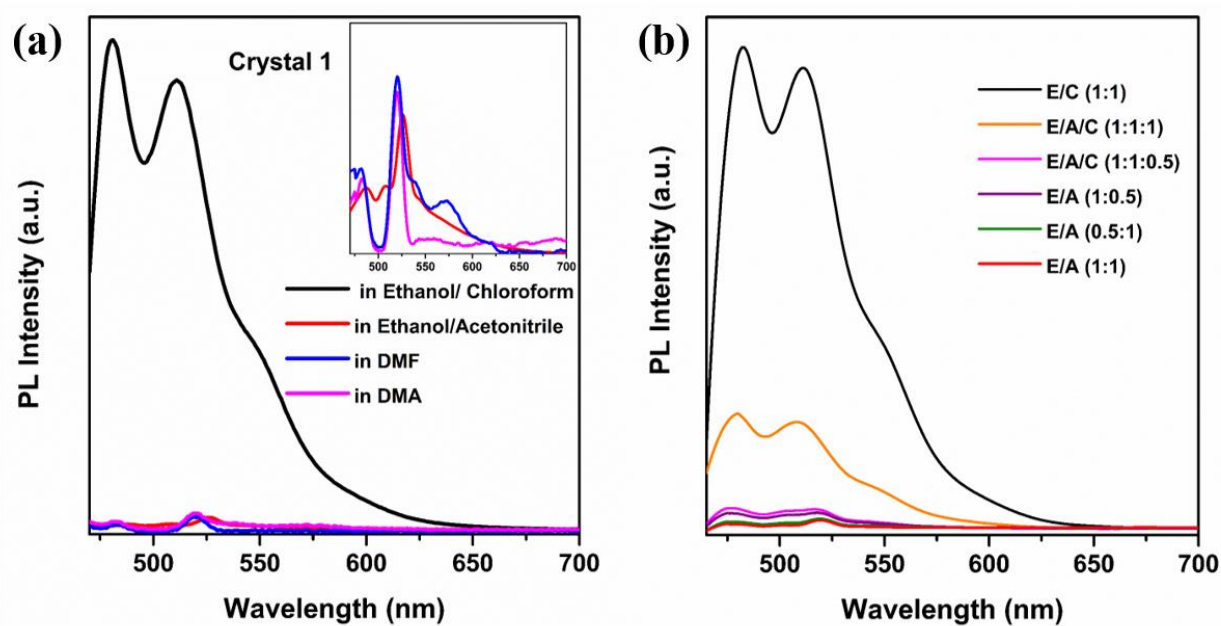

**Fig. S15** (a) PL of **crystal 1** dissolving in different solvents and (b) dissolving in different ratios of the ethanol/acetonitrile (E/A), ethanol/chloroform (E/C), and mix of three solvents ethanol/acetonitrile/ chloroform (E/A/C).



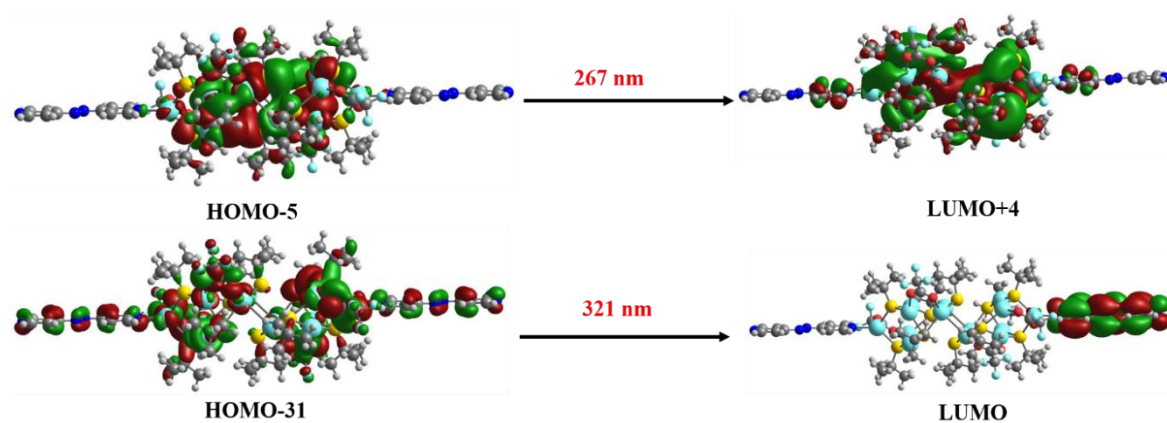

**Fig. S16** Molecular Orbitals involved in optical transitions of **crystal 1** in ethanol/chloroform solvent mixture. Colour code: Ag (large Cyan), S (yellow), O (red), N (blue), F (small Cyan), C (gray), H (white).

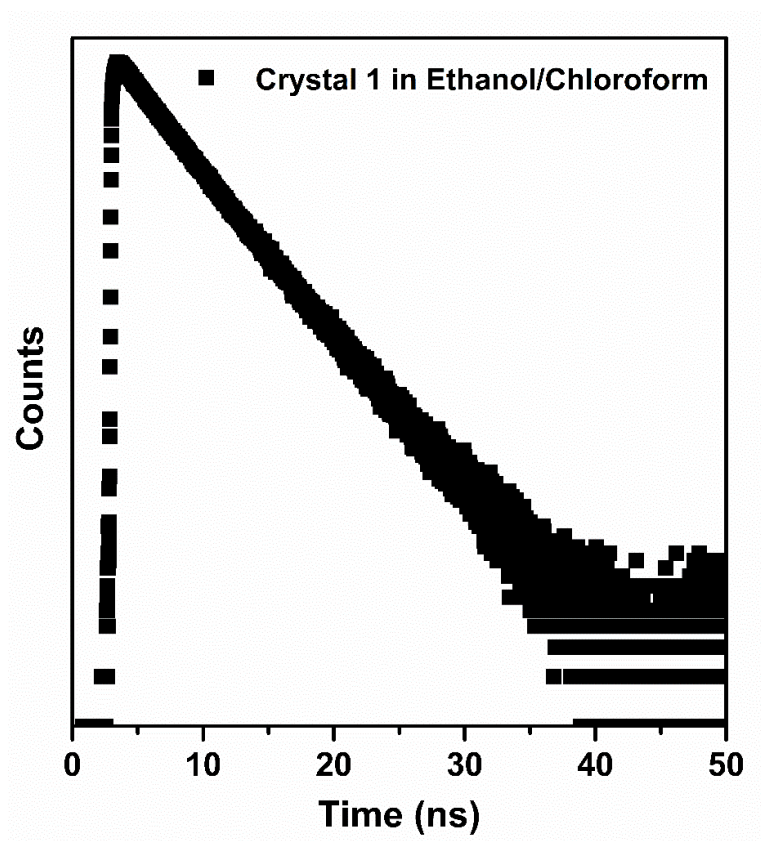

**Fig. S17** TCSPC trajectories of **crystal 1** in ethanol/chloroform mixture.

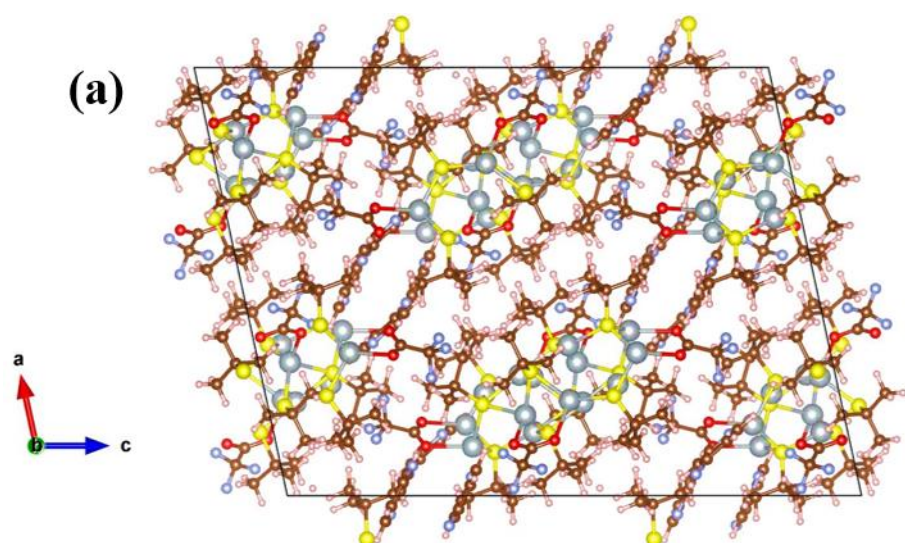

DFT optimized energy with optPBE vdW method: -4178.788 eV

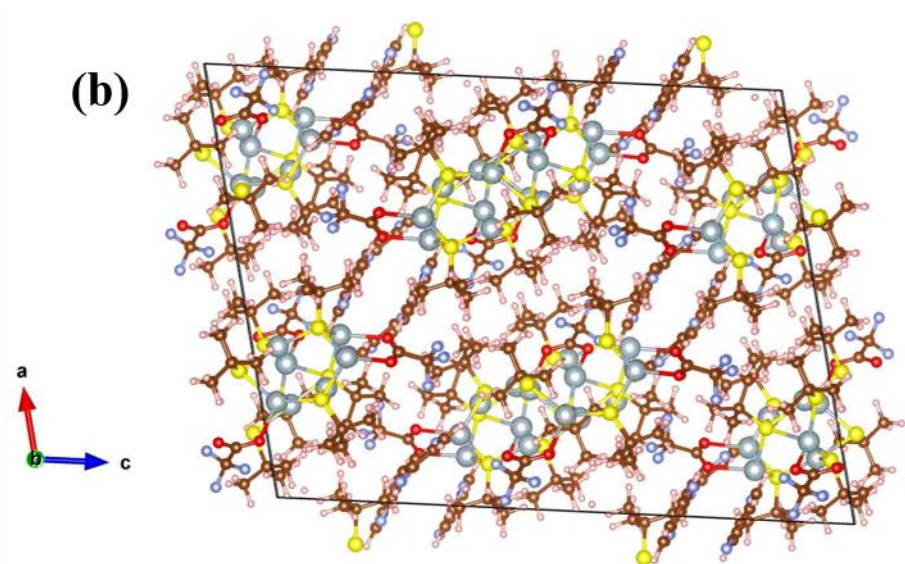

DFT optimized energy with optPBE vdW method: -4178.837 eV

**Fig. S18** Relative stability of (a) **crystal 1** and (b) **crystal 1a** obtained from DFT calculations.

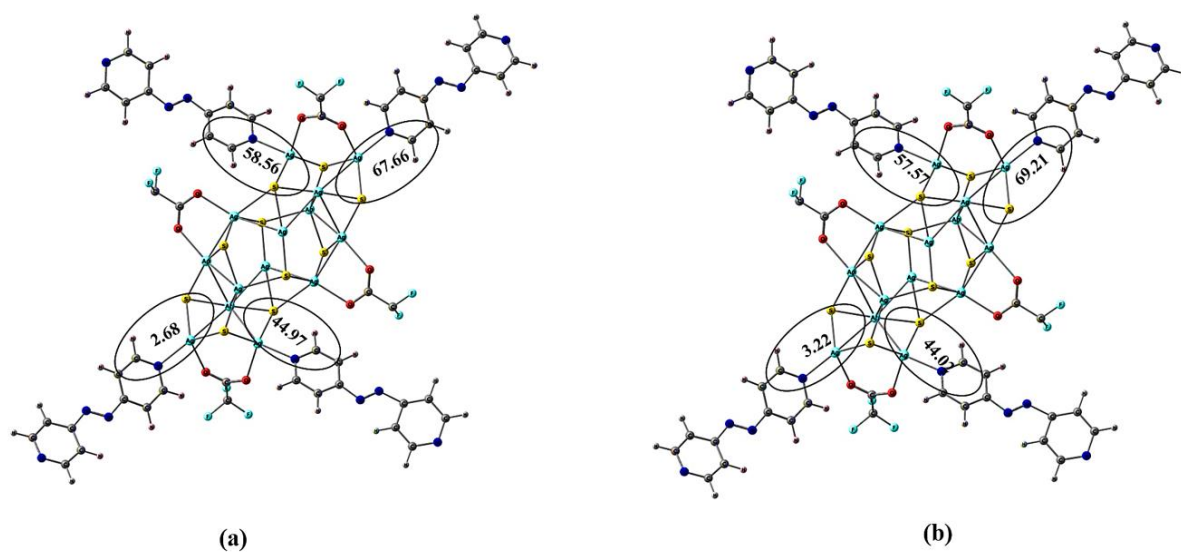

**Fig. S19** Dihedral angle between linker and core in (a) **crystal 1** and (b) **crystal 1a**. The methyl groups are omitted for clarity.

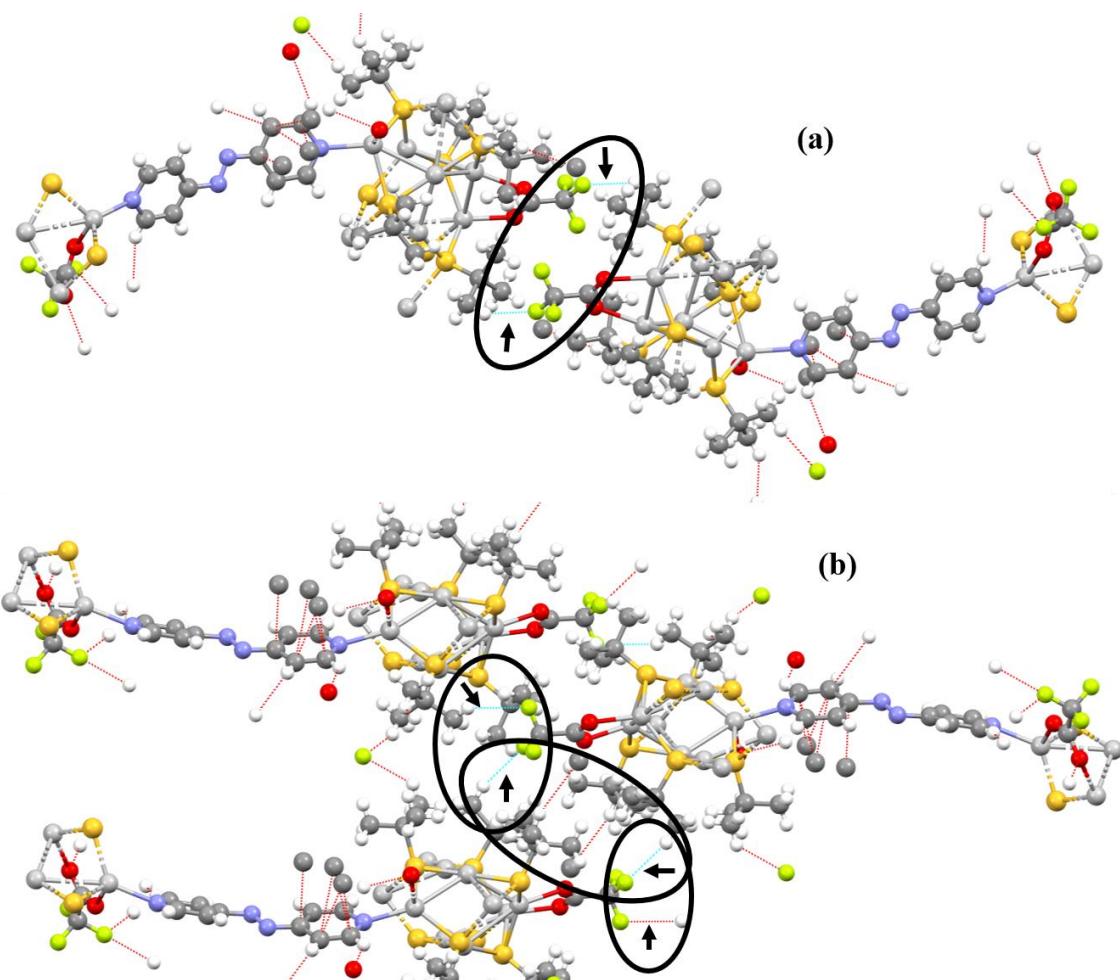

**For crystal 1**

| Nr | Typ   | Res | Donor | ---    | H.... | Acceptor | [ | ARU     | ] | D - H | H...A | D...A     | D - H...A | A...H...A* | A'...H...A'' |
|----|-------|-----|-------|--------|-------|----------|---|---------|---|-------|-------|-----------|-----------|------------|--------------|
| 1  | Intra | 1   | C3    | --H01H | ..04  |          | [ |         | ] | 0.96  | 2.54  | 3.45(2)   | 158       |            |              |
| 2  |       | 1   | C29   | --H25  | ..04  |          | [ | 2655.01 | ] | 0.93  | 2.58  | 3.280(16) | 133       |            |              |
| 3  | Intra | 1   | C25   | --H28  | ..02  |          | [ |         | ] | 0.93  | 2.54  | 3.200(15) | 128       |            |              |

**For crystal 1a**

| Nr | Typ   | Res | Donor | ---   | H.... | Acceptor | [ | ARU     | ] | D - H | H...A | D...A     | D - H...A | A...H...A* | A'...H...A'' |
|----|-------|-----|-------|-------|-------|----------|---|---------|---|-------|-------|-----------|-----------|------------|--------------|
| 1  | Intra | 1   | C3    | --H3C | ..04  |          | [ |         | ] | 0.96  | 2.55  | 3.453(13) | 156       |            |              |
| 2  |       | 1   | C6    | --H6B | ..F4  |          | [ | 2555.01 | ] | 0.96  | 2.54  | 3.424(11) | 153       |            |              |
| 3  | Intra | 1   | C25   | --H25 | ..02  |          | [ |         | ] | 0.93  | 2.54  | 3.199(11) | 128       |            |              |
| 4  |       | 1   | C29   | --H29 | ..04  |          | [ | 2555.01 | ] | 0.93  | 2.55  | 3.255(10) | 132       |            |              |

**Fig. S20** Inter-cluster C-H...F interaction of (a) **crystal 1** and (b) **crystal 1a** and corresponding crystallographic C-H...F interaction.



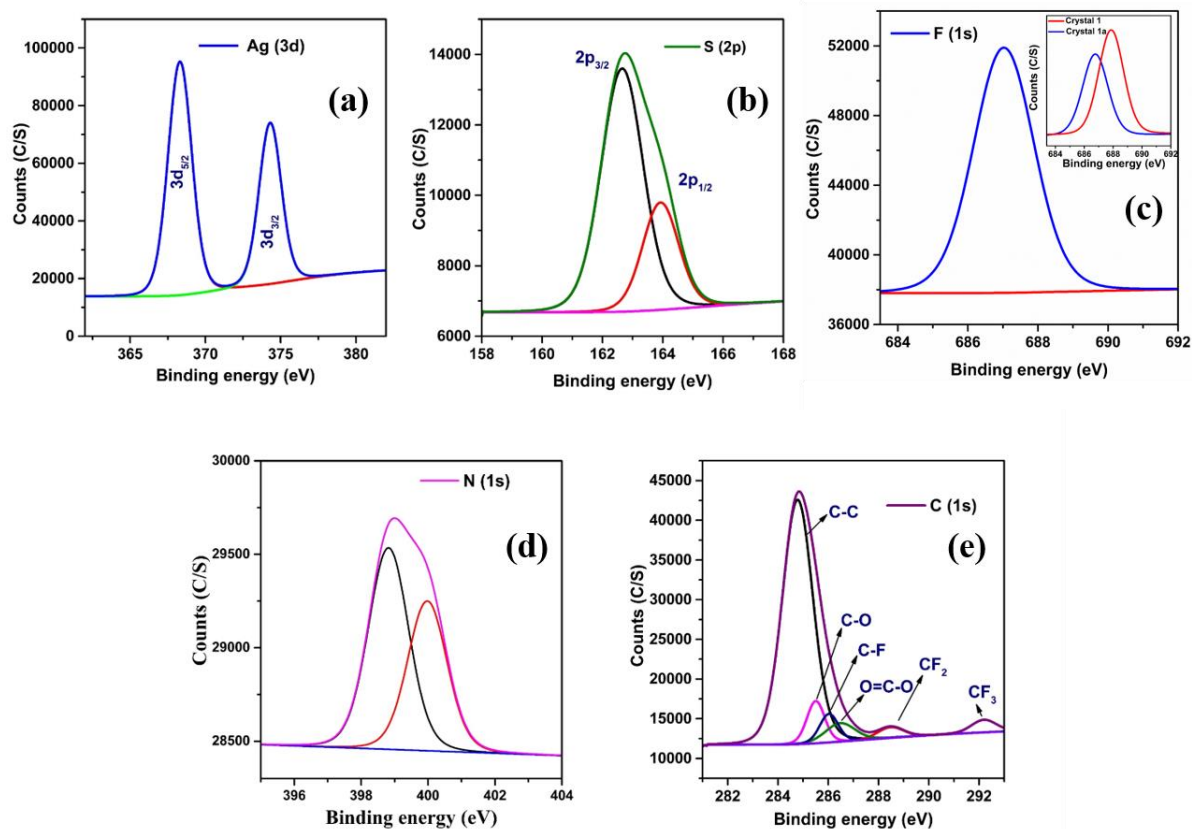

**Fig. S21** The deconvolution of XPS data of (a)  $3d_{5/2}$  and  $3d_{3/2}$  for Ag, (b)  $2p_{3/2}$  and  $2p_{1/2}$  for S atom, (c) 1s for F atom inset showing the difference of binding energy of both crystals, (d) 1s for N atom and (e) 1s for C atom of **crystal 1a**.

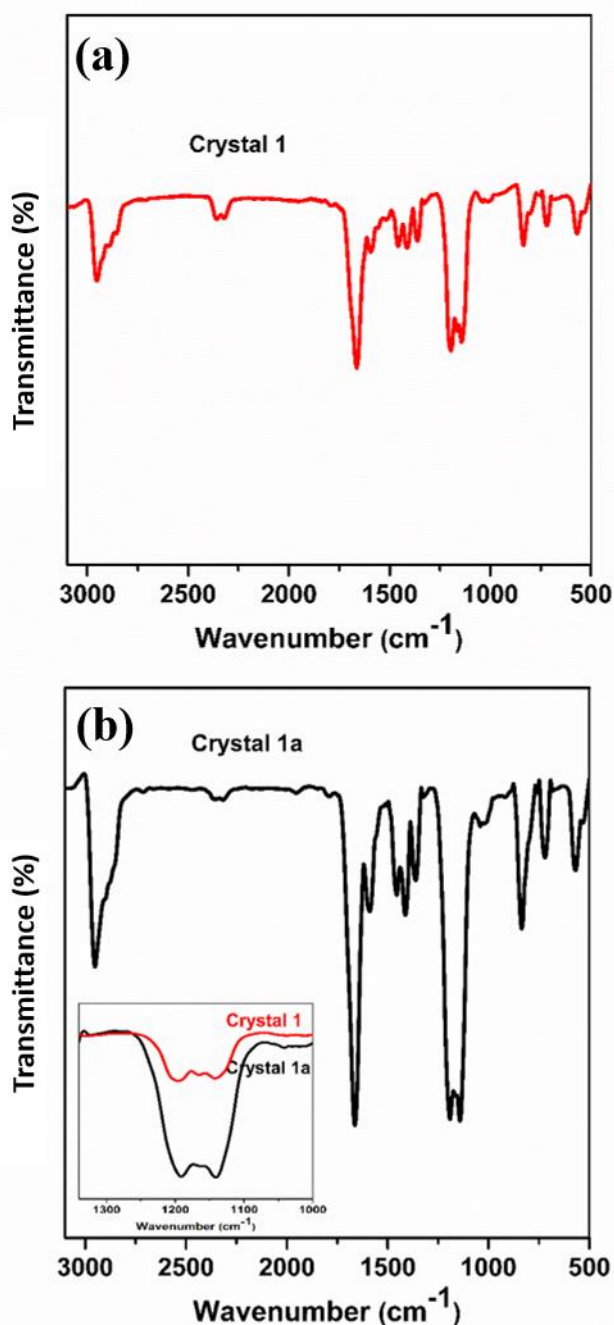

**Fig. S22** (a) FT-IR spectra of **crystal 1**. The peaks between 2800 and 3000  $\text{cm}^{-1}$  correspond to the  $\nu_{\text{C-H}}$  stretching frequency of terminal *tert*-butyl groups of thiolate ligand, peaks at 1662 and 1587  $\text{cm}^{-1}$  correspond to the  $\nu_{\text{C=O}}$  stretching frequency of trifluoroacetate and  $\nu_{\text{C-N}}$  stretching frequency from the linker molecules respectively (Fig. S5). The peaks at 1456 and 1357  $\text{cm}^{-1}$  correspond to the  $\nu_{\text{C-H}}$  bending vibrations and peaks at 1406 and 1193-1138  $\text{cm}^{-1}$  correspond to the  $\nu_{\text{N=N}}$  stretching vibration and  $\nu_{\text{C-F}}$  stretching frequency, peaks at 837 and 725  $\text{cm}^{-1}$  correspond to the  $\nu_{\text{C=C}}$  stretching vibrations and peak at 569  $\text{cm}^{-1}$  corresponds to the Ag-S stretching vibrations. (b) FT-IR spectra of **crystal 1a**, inset showing the peak-broadening in comparison with **crystal 1**.

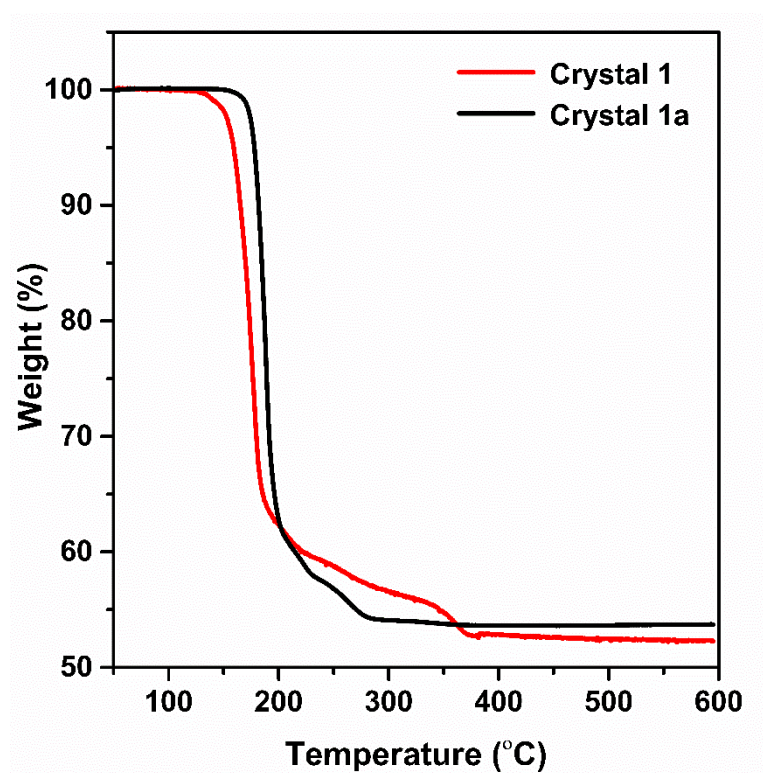

**Fig. S23** TGA of both **crystal 1** and **crystal 1a**.



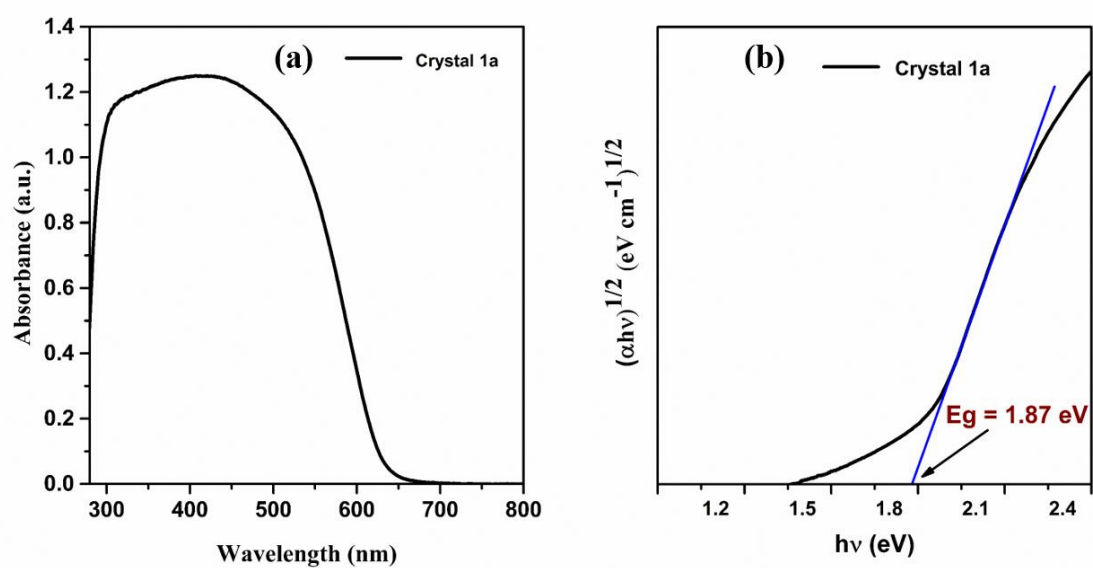

**Fig. S24** (a) Solid-state UV-vis absorbance of **crystal 1a** and (b) its characteristic band gap energy.

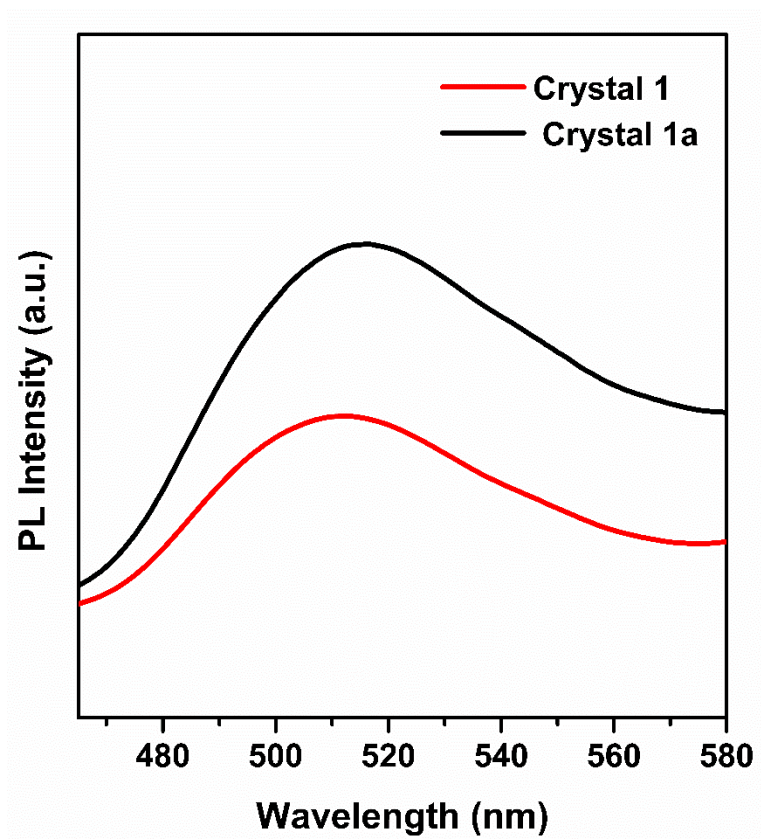

**Fig. S25** Solid-state PL of both **crystal 1** and **crystal 1a**.

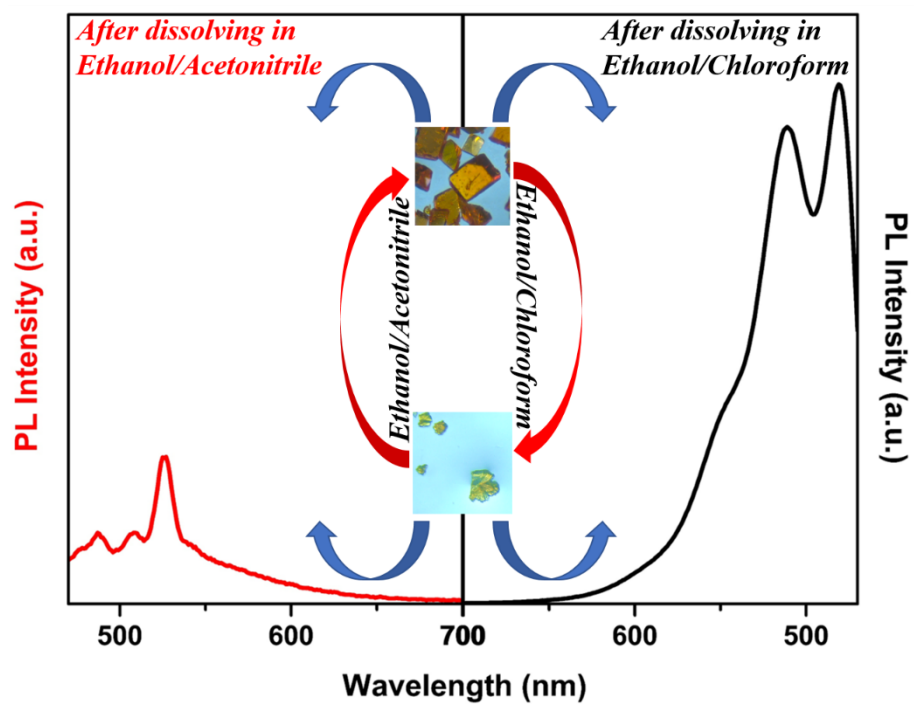

**Fig. S26** Schematic representation of interchanging behavior of both **crystal 1** and **crystal 1a** in the different solvent mixture.

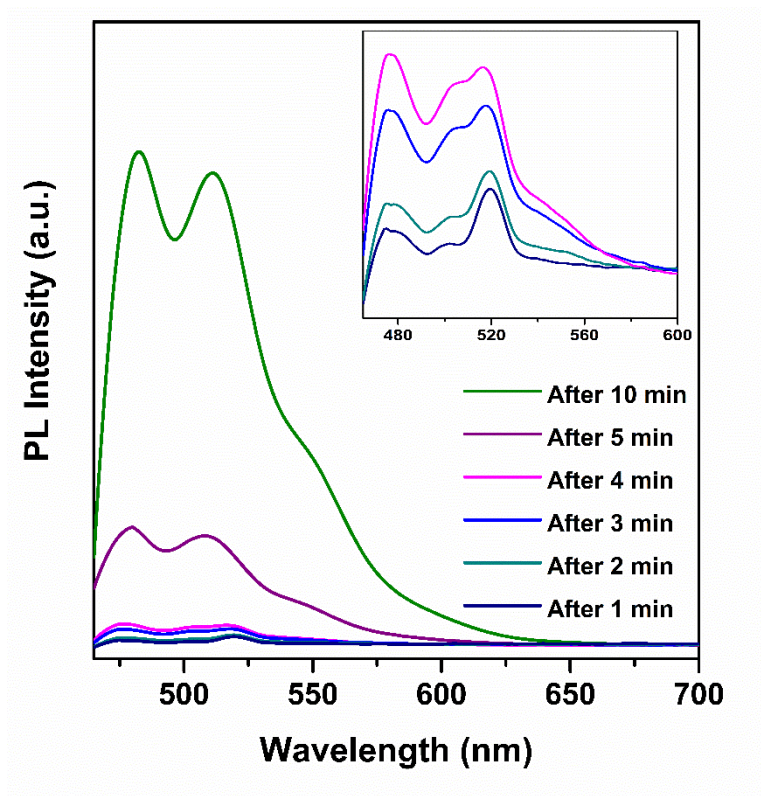

**Fig. S27** Dynamics of **crystal 1** in E/C towards the highest PL intensity.

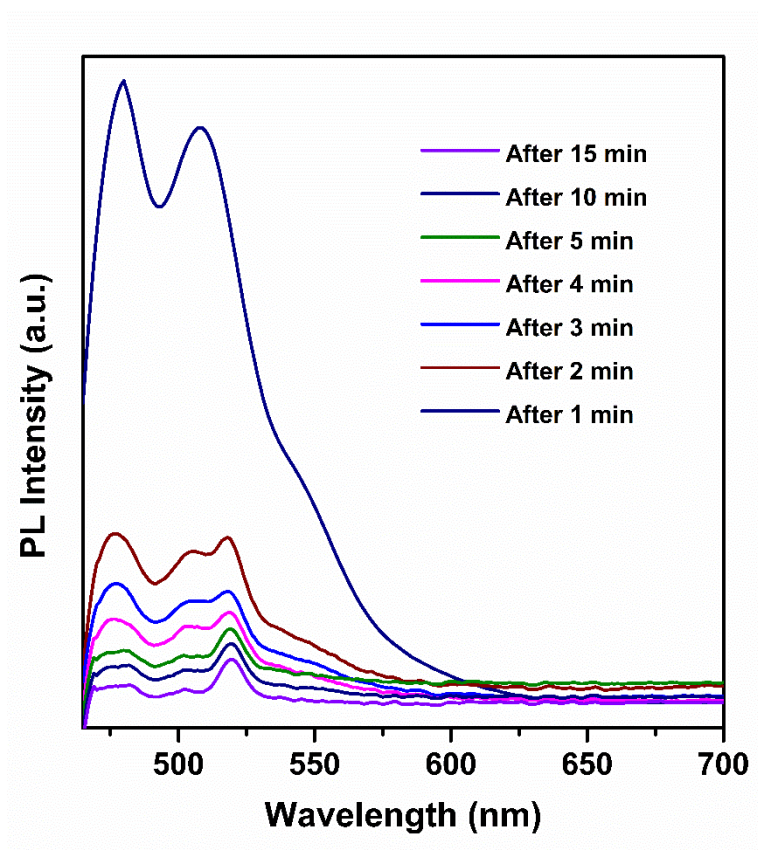

**Fig. S28** Dynamics of **crystal 1a** in E/A towards the lowest PL intensity.

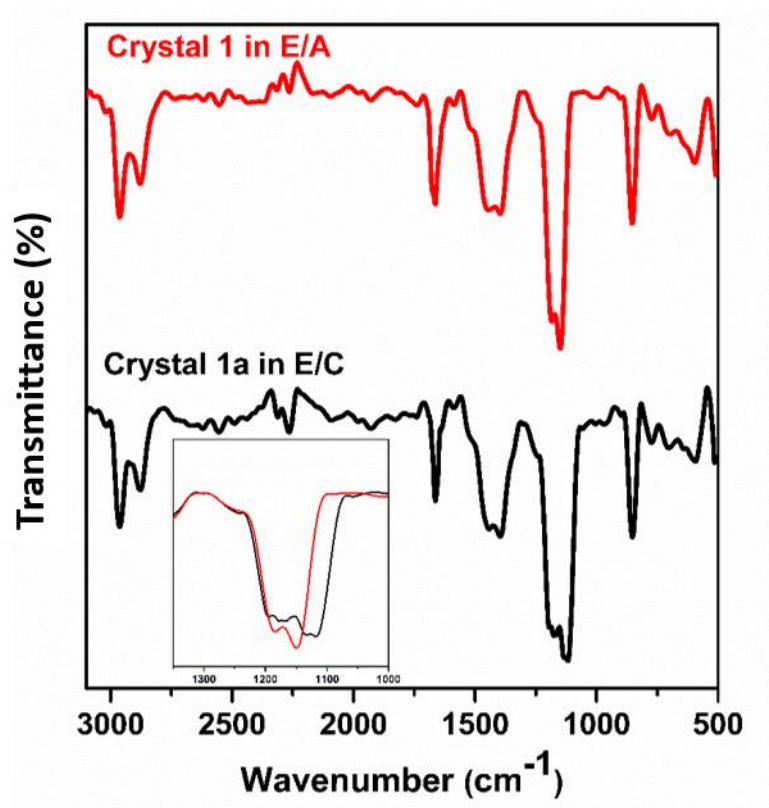

**Fig. S29** FT-IR spectra of **crystal 1** and **crystal 1a** in their respective solvent mixtures.

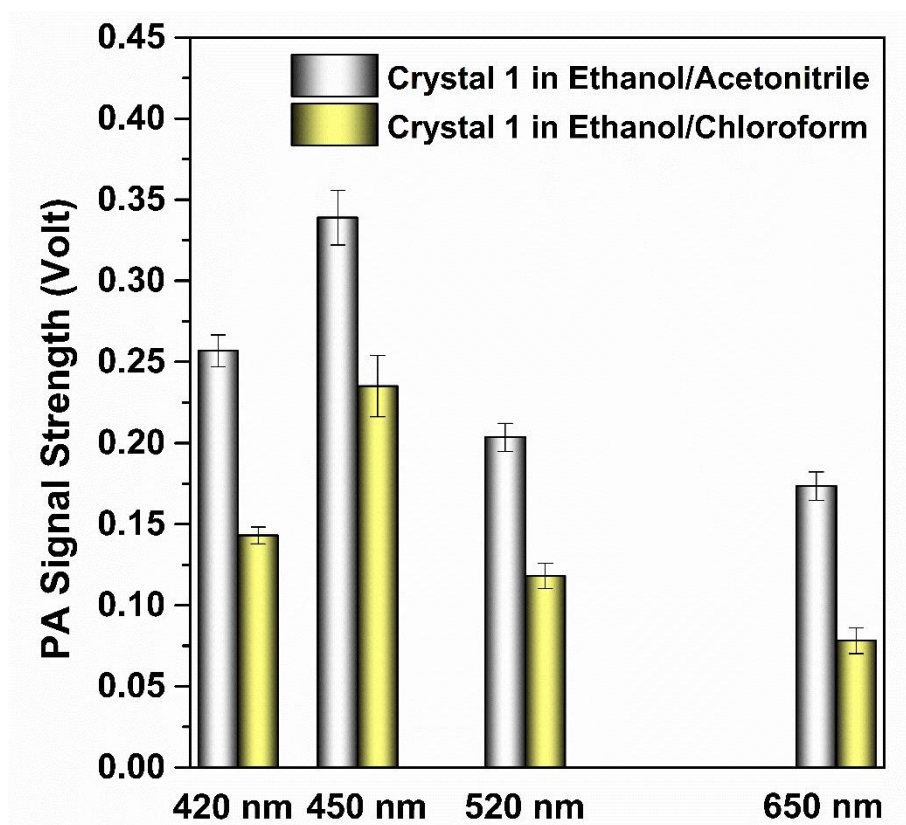

**Fig. S30** PA signal strength of both solution of **crystal 1** at different wavelength.

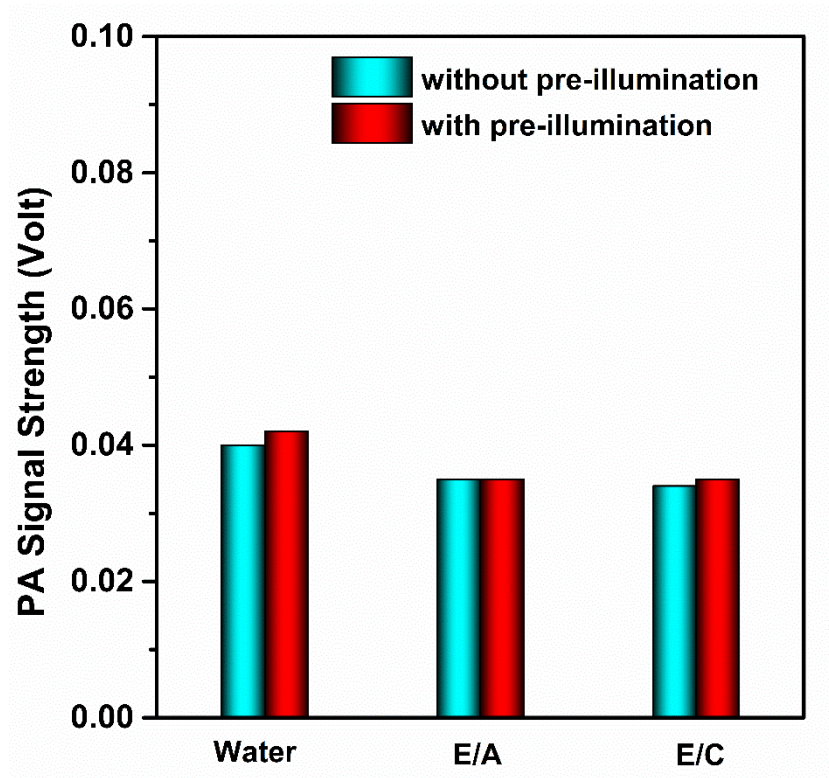

**Fig. S31** PA signal strength of the solvents for control.



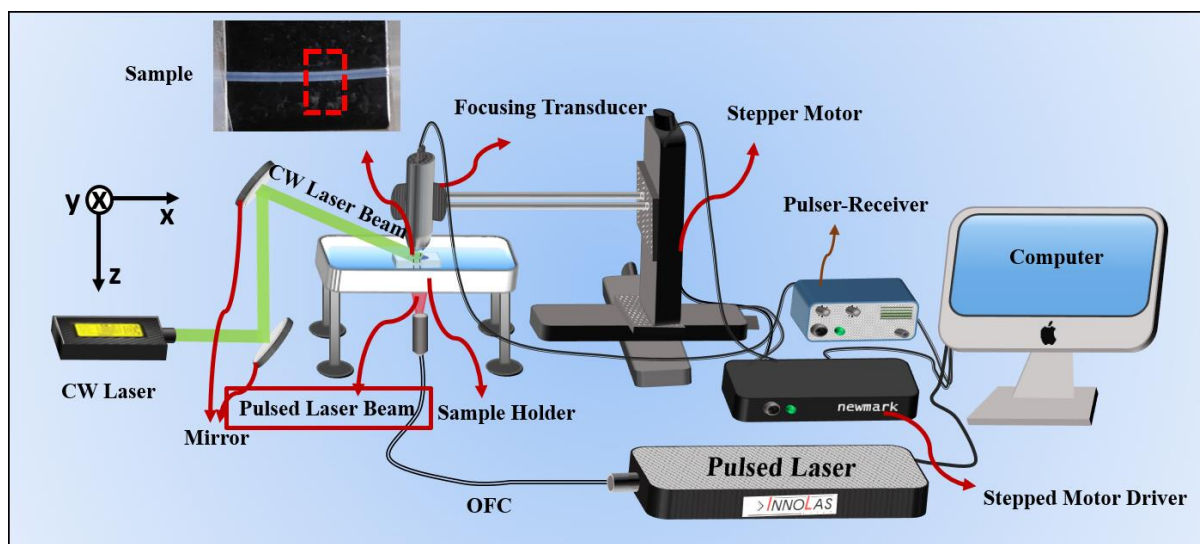

**Fig. S32** Schematic representation of pre-illumination PA signal detection technique adapted in the AR-PAM imaging system. Inset depicts a typical (optical) photograph of the (plastic) tube being fixed in a base. During the experiments with the AR-PAM imaging system, the sample solution of interest (nanocluster, in our case) was introduced through the tube.

## Reference

- 1 G. Li, Z. Lei and Q.-M. Wang, *J. Am. Chem. Soc.*, 2010, **132**, 17678-17679.
- 2 G. M. Sheldrick, *Acta Crystallogr., Sect. C: Struct. Chem.*, 2015, **71**, 3-8.
- 3 G. M. Sheldrick, *Acta Crystallogr., Sect. A: Found. Adv.*, 2015, **71**, 3-8.
- 4 L. J. Farrugia, *J. Appl. Crystallogr.*, 2012, **45**, 849-854.
- 5 O. V. Dolomanov, L. J. Bourhis, R. J. Gildea, J. A. Howard and H. Puschmann, *J. Appl. Crystallogr.*, 2009, **42**, 339-341.
- 6 M. J. Frisch, G. W. Trucks, H. B. Schlegel, G. E. Scuseria, M. A. Robb, J. R. Cheeseman, G. Scalmani, V. Barone, G. A. Petersson, H. Nakatsuji, X. Li, M. Caricato, A. V. Marenich, J. Bloino, B. G. Janesko, R. Gomperts, B. Mennucci, H. P. Hratchian, J. V. Ortiz, A. F. Izmaylov, J. L. Sonnenberg, Williams, F. Ding, F. Lipparini, F. Egidi, J. Goings, B. Peng, A. Petrone, T. Henderson, D. Ranasinghe, V. G. Zakrzewski, J. Gao, N. Rega, G. Zheng, W. Liang, M. Hada, M. Ehara, K. Toyota, R. Fukuda, J. Hasegawa, M. Ishida, T. Nakajima, Y. Honda, O. Kitao, H. Nakai, T. Vreven, K. Throssell, J. A. Montgomery Jr., J. E. Peralta, F. Ogliaro, M. J. Bearpark, J. J. Heyd, E. N. Brothers, K. N. Kudin, V. N. Staroverov, T. A. Keith, R. Kobayashi, J. Normand, K. Raghavachari, A. P. Rendell, J. C. Burant, S. S. Iyengar, J. Tomasi, M. Cossi, J. M. Millam, M. Klene, C. Adamo, R. Cammi, J. W. Ochterski, R. L. Martin, K. Morokuma, O. Farkas, J. B. Foresman and D. J. Fox, Wallingford, CT, 2016.
- 7 A. D. Becke, *J. Chem. Phys.*, 1993, **98**, 5648-5652.
- 8 P. J. Hay and W. R. Wadt, *J. Chem. Phys.*, 1985, **82**, 270-283.
- 9 W. R. Wadt and P. J. Hay, *J. Chem. Phys.*, 1985, **82**, 284-298.
- 10 V. Barone and M. Cossi, *J. Phys. Chem. A*, 1998, **102**, 1995-2001.
- 11 G. Kresse, J. Furthmüller and J. Hafner, *Phys. Rev. B*, 1994, **50**, 13181.
- 12 J. P. Perdew, J. A. Chevary, S. H. Vosko, K. A. Jackson, M. R. Pederson, D. J. Singh and C. Fiolhais, *Phys. Rev. B*, 1992, **46**, 6671.
- 13 G. Kresse and D. Joubert, *Phys. Rev. B*, 1999, **59**, 1758.
- 14 A. Thomas, S. Paul, J. Mitra and M. S. Singh, *Sensors*, 2021, **21**, 1190.
